# Supplementary material
Source: PubMed Central journal article supplement (PMC4277577)

# Supplementary Figures

**TITLE:** Pyrosequencing of *mcrA* and archaeal 16S rRNA genes reveals diversity and substrate preference of anaerobic digester methanogen communities

**RUNNING TITLE:** Methanogens in anaerobic digesters

**KEY WORDS:** Methanogens, anaerobic digestion, biogas, *mcrA* gene, archaea 16S rRNA gene, 454 pyrosequencing

**AUTHORS:** David Wilkins, Xiao-Ying Lu<sup>†</sup>, Zhiyong Shen, Jiapeng Chen, and Patrick K. H. Lee<sup>‡</sup>

**AFFILIATION:** School of Energy and Environment, City University of Hong Kong, Hong Kong

<sup>†</sup>Current address: Faculty of Science and Technology, Technological and Higher Education Institute of Hong Kong, Hong Kong

**CORRESPONDENT:** <sup>‡</sup>B5424-AC1, School of Energy and Environment, City University of Hong Kong, Tat Chee Avenue, Kowloon, Hong Kong; E-mail: patrick.kh.lee@cityu.edu.hk; Tel: (852) 3442-4625; Fax: (852) 3442-0688.

Supplementary Figure 1: Rarefaction curves for OTUs of each gene and from each digester.

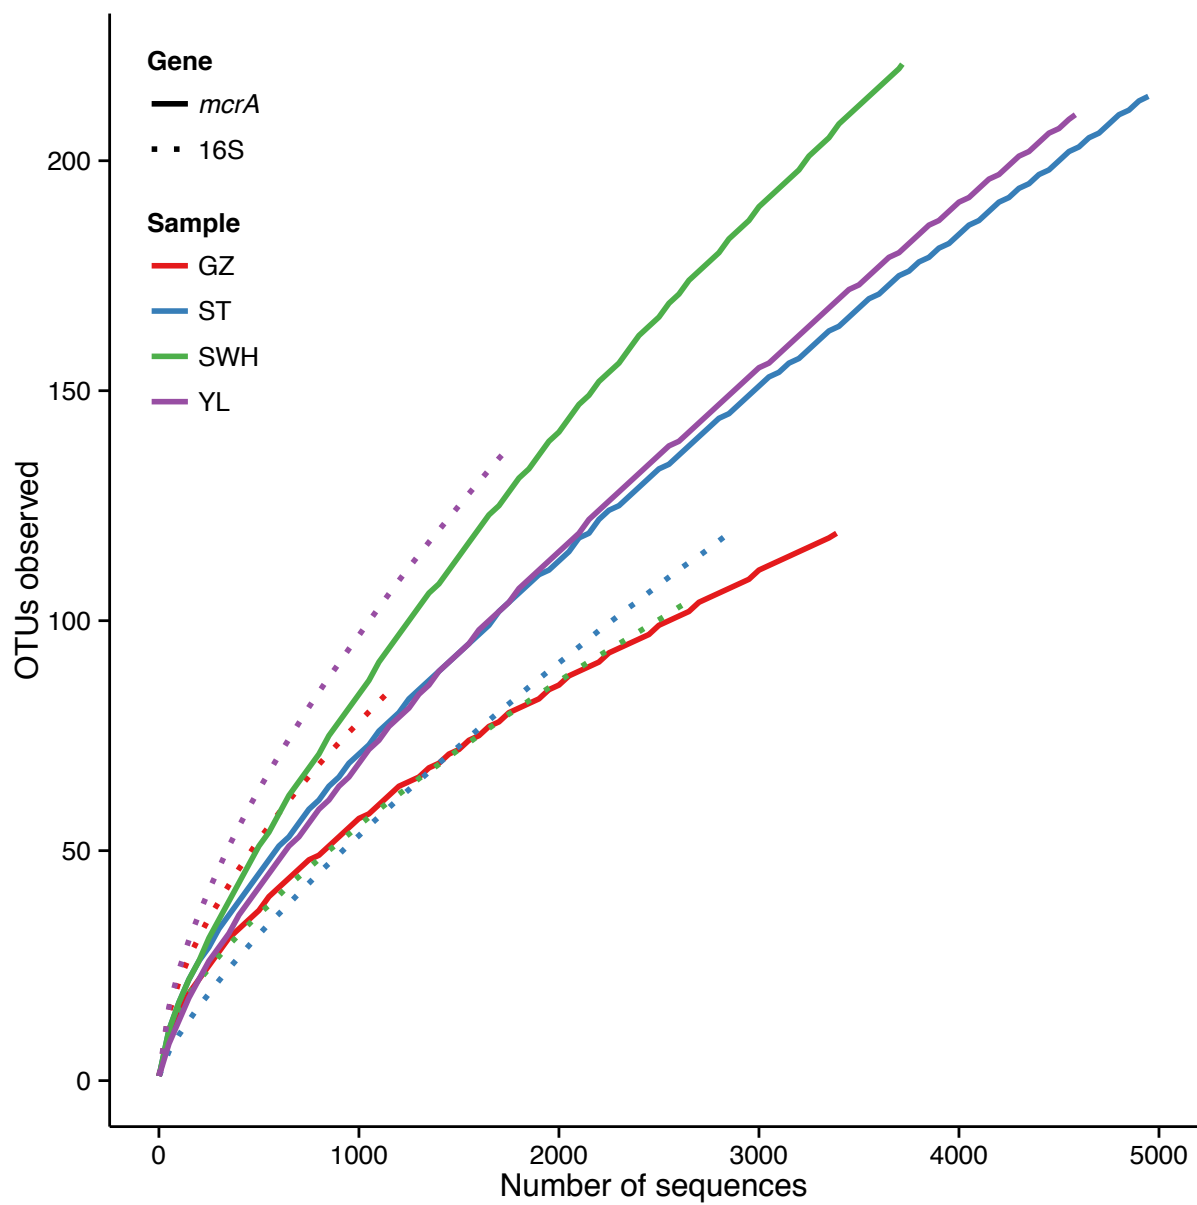

**Supplementary Figure 2:** Rank-abundance curves for OTUs of each gene and from each digester.

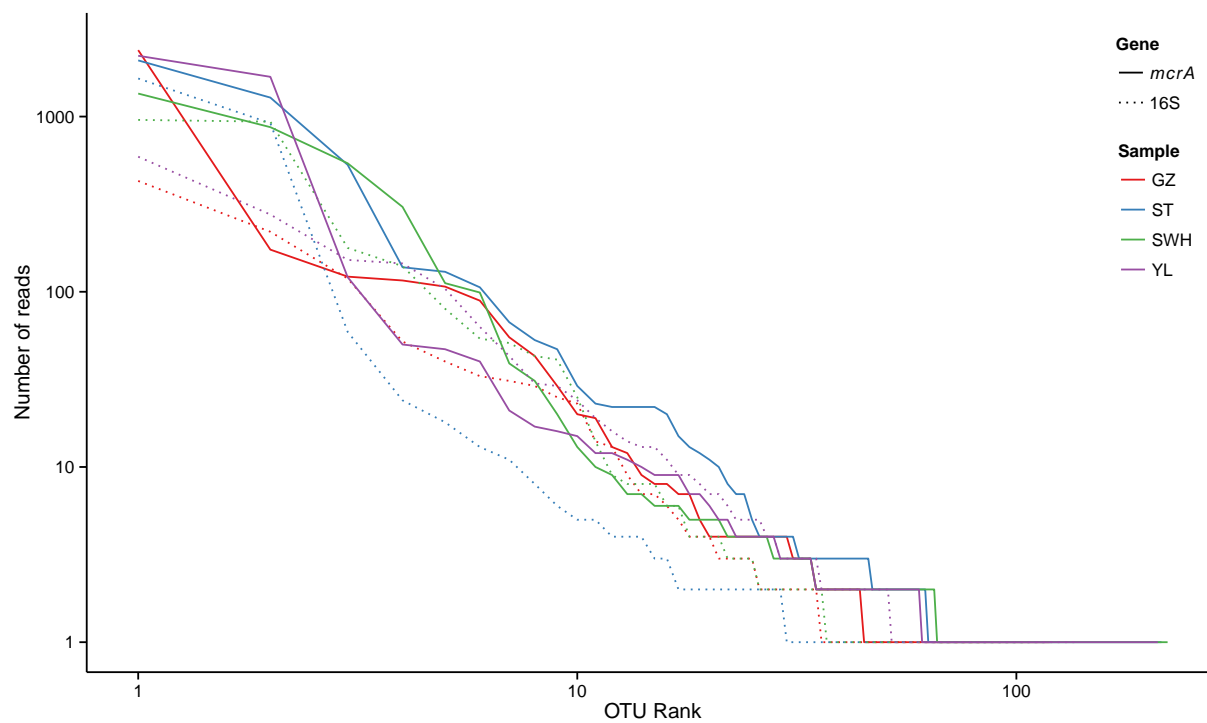

**Supplementary Figure 3:** Venn diagrams indicating number of overlapping OTUs between the digester methanogen (*mcrA*) and archaea (16S rRNA) communities. Five OTUs<sub>*mcrA*</sub> (OTU002, OTU029, OTU037 & OTU039, *Methanobacteriaceae*; OTU005, *Methanosaetaceae*) and three OTUs<sub>16S</sub> (OTU002, WSA2; OTU003, *Methanosaetaceae*; OTU007, *Methanoregulaceae*) were shared between all digesters.

## *mcrA*

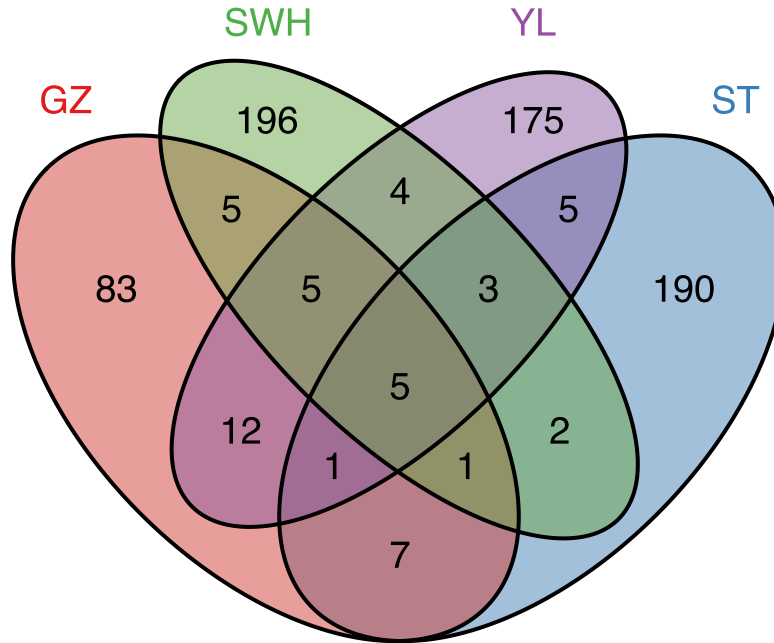

## 16S rRNA

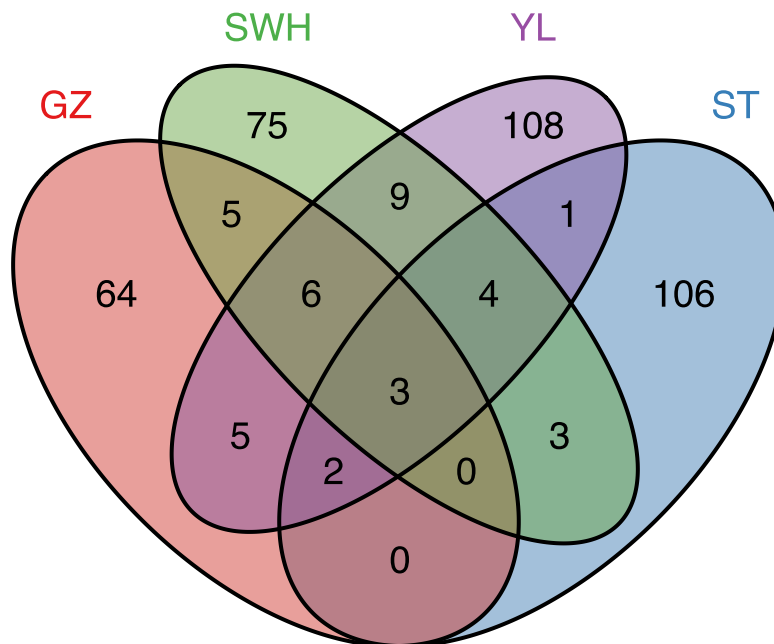

Supplement: AEM.02566-14_zam999105943so1.pdf [file AEM.02566-14_zam999105943so1.pdf]
